# Supplementary material for: Implementation fidelity of the blended Optimal Physical Recovery After Hospitalization (OPRAH) intervention for patients after oncological surgery
Source: Research Square preprint supplement (doi:10.21203/rs.3.rs-6920815/v1), 2025-07-02
Supplement: Supplementary file 1 [file 808e318701e5d316905c8f6f.docx]

# Supplementary File 1 – Motivational Interviewing Treatment Integrity (MITI) score

**Table 1:** Behaviour codes conversations

| **Healthcare**  **professional** | Q | GI | SR | CR | PERS | AF | EA | CONFR | SC | PERS with |
| --- | --- | --- | --- | --- | --- | --- | --- | --- | --- | --- |
| **Confer 1: A** | 10 | 1 | 2 | - | 2 | - | 1 | - | - | - |
| **Confer 2: A** | 8 | 2 | 7 | - | 7 | - | - | - | - | - |
| **Confer 3: A** | 9 | 5 | 6 | - | 2 | 4 | - | - | - | - |
| **Confer 4: B** | 10 | 3 | 2 | - | - | 6 | - | - | 2 | - |
| **Confer 5: C** | 18 | 15 | 6 | 1 | 7 | 3 | - | - | - | - |
| **Confer 6: D** | 33 | 23 | 2 | 2 | 3 | 2 | 1 | 1 | 2 | - |
| **Confer 7: E** | 47 | 5 | 2 | 1 | 4 | - | - | - | 2 | - |

Confer = conversation number

Q = Question

GI = Giving information

SR = Simple reflection

CR = Complex reflection

PERS = Persuade

AF = Affirm

EA = Emphasizing autonomy

CONFR = Confront

SC = Seeking Collaboration

PERS with = Persuade with permission

**Table 2:** List of key ratios and percentages of behavioural codes regarding competence in MI behaviour

| **Healthcare**  **professional** | % CR | R:Q | MIA | MINA | MIA% |
| --- | --- | --- | --- | --- | --- |
| **Confer 1: A** | 0% | 1:5 | 1 | 2 | 33.33% |
| **Confer 2: A** | 0% | 7:8 | - | 7 | 0% |
| **Confer 3: A** | 0% | 2:3 | 4 | 2 | 66.67% |
| **Confer 4: B** | 0% | 1:5 | 8 | - | 100% |
| **Confer 5: C** | 20% | 5:18 | 3 | 7 | 30% |
| **Confer 6: D** | 25% | 8:33 | 5 | 4 | 55.56% |
| **Confer 7: E** | 33.33% | 3:47 | 2 | 4 | 33.33% |

Note:

Confer = conversation number

% CR = percentage complex reflections of total reflections

R:Q = ratio reflections and questions

MIA = motivational interviewing adherent behaviour

MINA = motivational interviewing non-adherent behaviour

% MIA = percentage motivational interviewing adherent behaviour
