# Supplementary material for: Implementation fidelity of the blended Optimal Physical Recovery After Hospitalization (OPRAH) intervention for patients after oncological surgery
Source: Research Square preprint supplement (doi:10.21203/rs.3.rs-6920815/v1), 2025-07-02
Supplement: Supplementary file 2 [file b3b3467ec1650960f944eac7.docx]

# Supplementary File 2 - SWOT analysis for long-term implementation of OPRAH

| **Strengths** | **Weaknesses** |
| --- | --- |
| - Increased patient autonomy through insight into exercise and nutrition data. - Creates patient awareness. - Insight into how the patient is doing and to identify whether additional support is needed. - Support can be adjusted based on patient’s needs. - Multiple options for counselling: Data, chat, and telephone - The short lines of communication between the healthcare professional and the patient provides a sense of safety - Physiotherapist and dietitians know how to reach out to each other more easily. | - Multiple practitioners from one discipline makes use sometimes difficult. - Patients who recover should be support more efficiently - Work schedules are not set up for remote coaching. |
| **Opportunities** | **Treats** |
| - If a patient recovers well, the intervention can save time. - Apply intervention in all oncological surgery patients - Apply intervention also in other phases of the care pathway, such as prehabilitation and during chemotherapy - Further fine-tune expectation management about coaching of patients - Deployment in regular care through link with electronic health record - Create screening tool for degree of coaching for more efficiency | - Difficult to keep a good overview of patients as numbers increase - Logging into external dashboard is an extra action - Intervention was not part of usual care and added extra pressure to the daily routine |
